# Supplementary material
Source: MDPI journal article supplement (https://www.mdpi.com/2304-6767/11/7/179)
Supplement: s1 [file s1]

## Supplementary Materials

**Table S1.** Correlation matrices for structural equation model (complete data for total sample).

|                     | CPQ1      | CPQ2      | SE1       | SE2       | CDA1     | CDA2     | CDA3 | Mean  | SD   |
|---------------------|-----------|-----------|-----------|-----------|----------|----------|------|-------|------|
| CPQ1 ¥              | 1.00      |           |           |           |          |          |      | 16.67 | 7.03 |
| CPQ2                | 0.59 ***  | 1.00      |           |           |          |          |      | 20.38 | 7.40 |
| SE1 ∞               | -0.28 *** | -0.20 *** | 1.00      |           |          |          |      | 3.71  | 1.40 |
| SE2                 | -0.14 *** | -0.06 *   | 0.08 ***  | 1.00      |          |          |      | 2.53  | 0.81 |
| CDA1 **             | 0.15 ***  | 0.21 ***  | -0.05 *   | 0.01      | 1.00     |          |      | 19.37 | 8.12 |
| CDA2                | 0.19 **   | 0.17 ***  | -0.13 *** | -0.10 *** | 0.69 *** | 1.00     |      | 8.27  | 4.15 |
| CDA3                | 0.09 ***  | 0.14 ***  | -0.05 *   | -0.06 *   | 0.50 *** | 0.37 *** | 1.00 | 5.45  | 2.68 |
| Total sample = 1837 |           |           |           |           |          |          |      |       |      |

¥ CPQ 1 and 2: Child Perception Questionnaire oral and functional factor (CPQ 1) and psychosocial (CPQ 2) subscales. ∞ SE 1 and 2: Self-esteem hesitant (SE 1) and confidence (SE 2) subscales \*\* CDA 1, 2, 3: CFSS-DS dental fear (CD 1), hospital fear (CDA 2), and stranger fear (CDA 3) subscales \*  $p < 0.05$ , \*\*  $p < 0.01$ , \*\*\*  $p < 0.001$ .
